# Supplementary material for: Molecular Assessment of HER2 to Identify Signatures Associated with Therapy Response in HER2-Positive Breast Cancer
Source: MDPI journal article supplement (doi:10.3390/cancers14112795), 2022-06-04
Supplement: s1 [file s1]

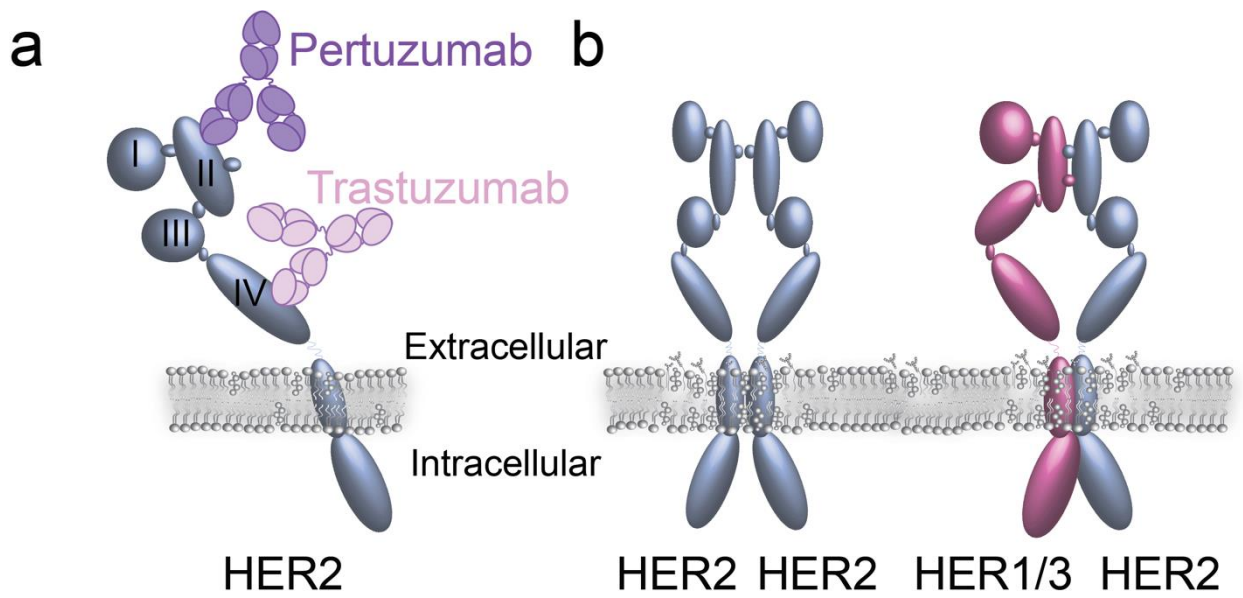

**Figure S1.** Schematic representation of HER2. **a.** Scheme of trastuzumab and pertuzumab binding to HER2. **b.** Schematic representation of HER2 homodimers and heterodimers.

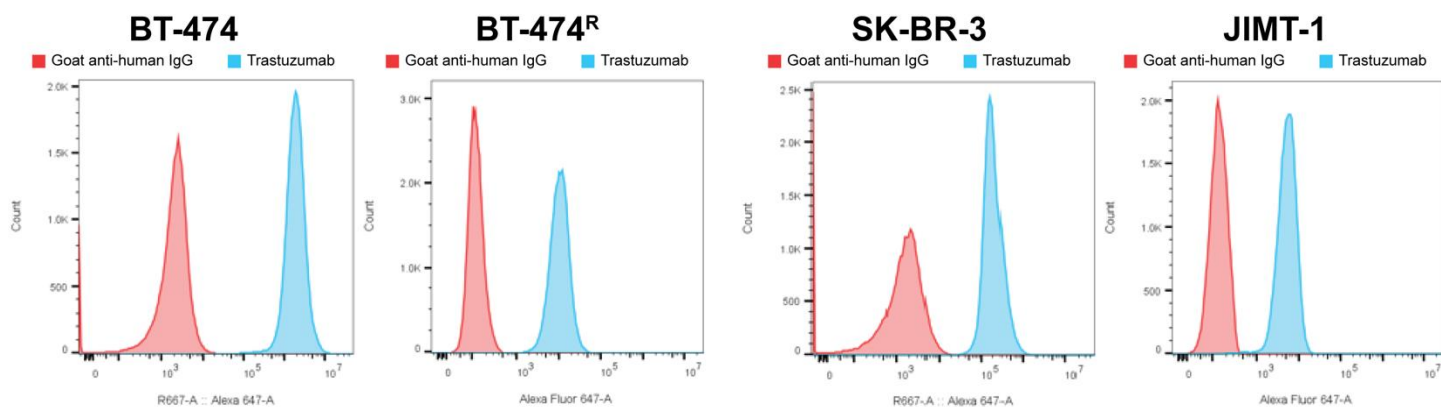

**Figure S2.** Cultured cell lines express HER2 protein. HER2 protein expression was detected in BT-474, BT-474<sup>R</sup>, SK-BR-3, and JIMT-1 cells by flow cytometry using trastuzumab-AF647.

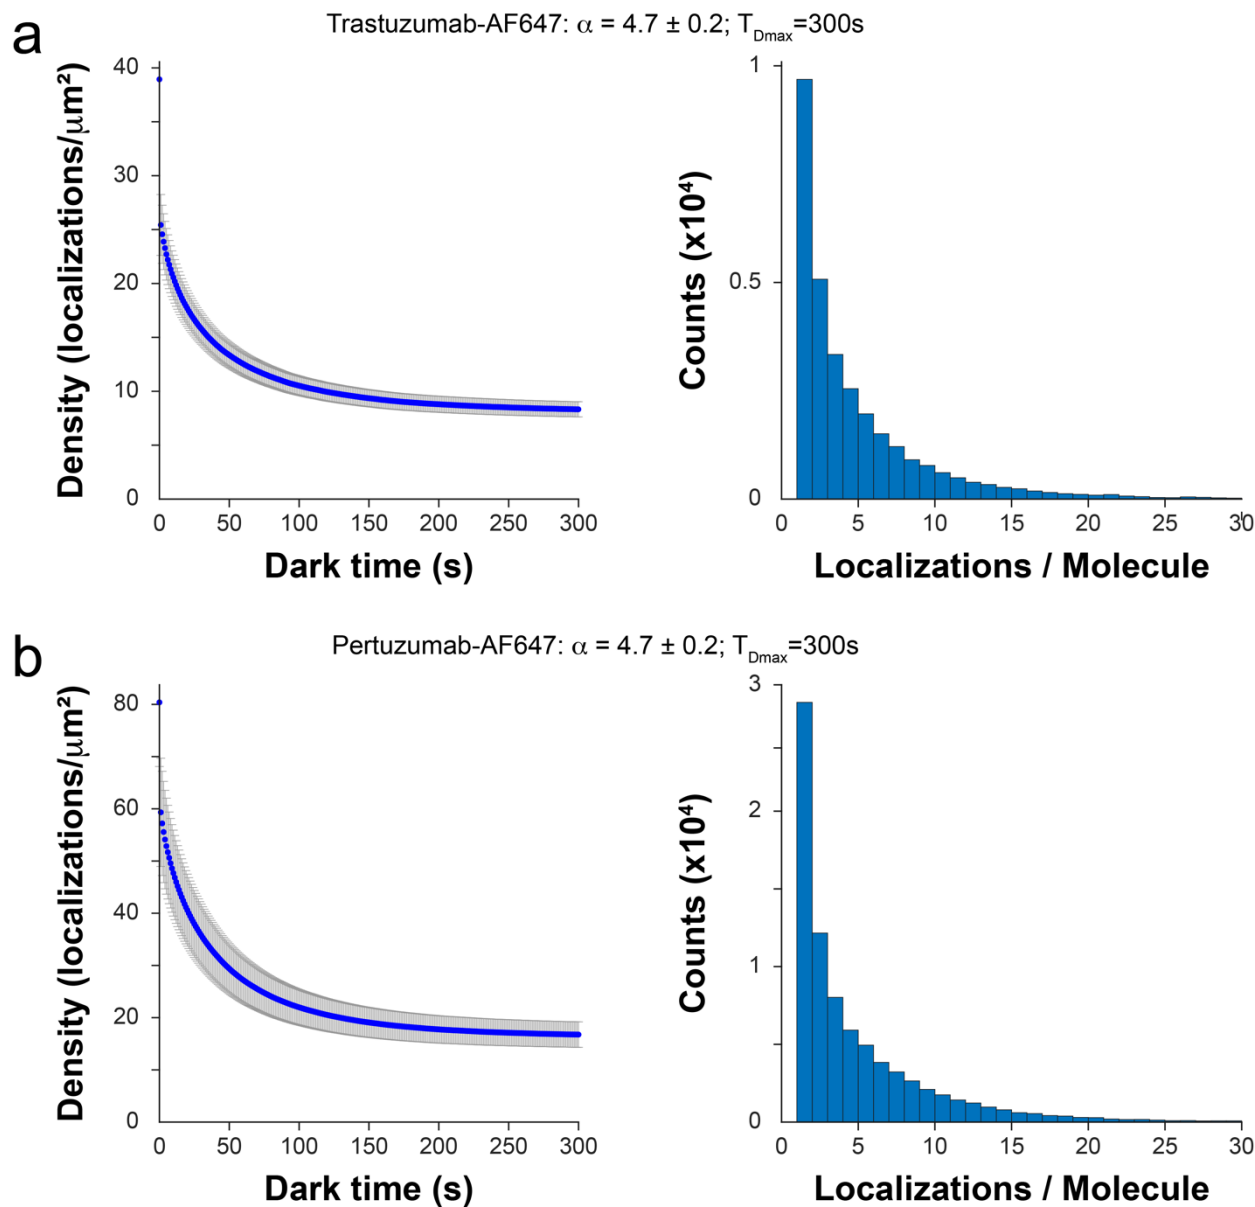

**Figure S3.** Photophysical properties of fluorescent reporters. **a.** Average number of localizations ( $\alpha$ ) for trastuzumab-AF647 was 5 and the maximum dark time ( $T_{Dmax}$ ) was 300 s. **b.** Average number of localizations for pertuzumab-AF647 was 5 and the maximum dark time was 300 s. Localizations were detected with a  $64 \mu m^2$  region of interest (ROI); 10 ROIs were assessed for trastuzumab-AF647 and 13 ROIs were assessed for pertuzumab-AF647.

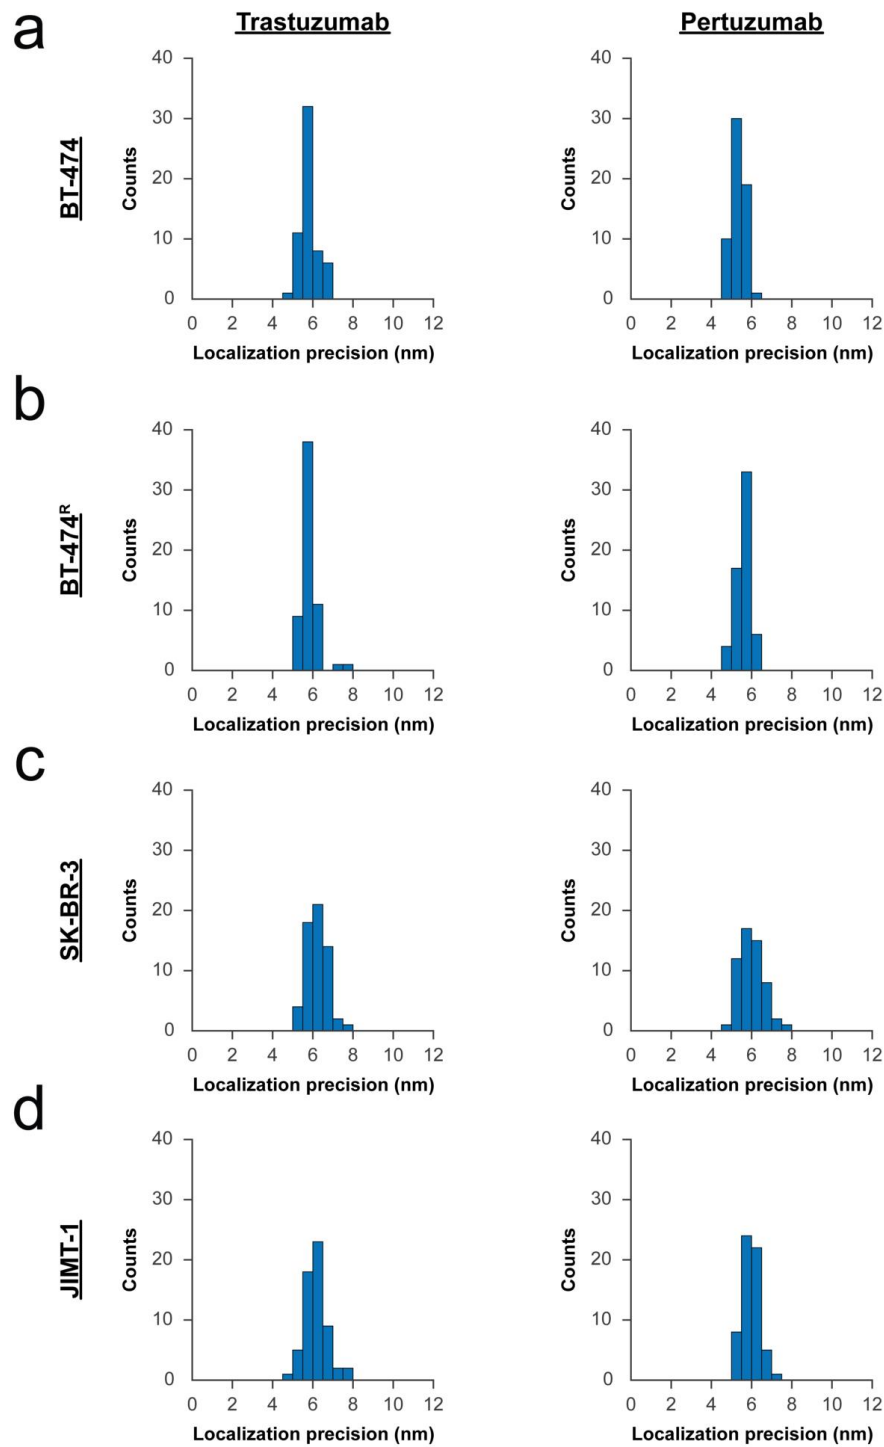

**Figure S4.** Distributions of lateral localization precisions in breast cancer cell lines. Lateral localization precisions ( $\sigma$ ) were obtained using NIS Elements software for all investigated ROIs in cultured cell lines for detection of HER2 with either trastuzumab-AF647 (left) or pertuzumab-AF647 (right). Distributions of  $\sigma$  are shown for: **a.** BT-474 cells, **b.** BT-474<sup>R</sup> cells, **c.** SK-BR-3 cells, and **d.** JIMT-1 cells. .

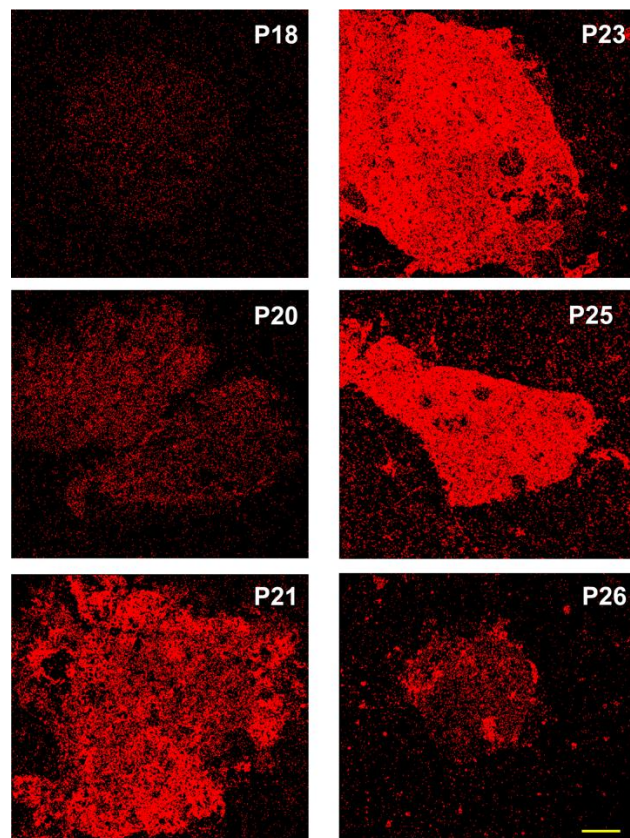

**Figure S5.** Representative SMLM images of HER2 for individual patients. Scale bar is 5  $\mu\text{m}$ .

**Table S1 Summary of qSMLM data for cultured cell lines.**

| <b>a</b>                                              | Trastuzumab-AF647 |                     | Pertuzumab-AF647 |                     |
|-------------------------------------------------------|-------------------|---------------------|------------------|---------------------|
|                                                       | BT-474            | BT-474 <sup>R</sup> | BT-474           | BT-474 <sup>R</sup> |
| <b>Density (molecules/<math>\mu\text{m}^2</math>)</b> |                   |                     |                  |                     |
| Mean $\pm$ SEM                                        | 221 $\pm$ 12      | 182 $\pm$ 7         | 85 $\pm$ 3       | 92 $\pm$ 4          |
| Median                                                | 195               | 179                 | 83.8             | 87.1                |
| CV (%)                                                | 43                | 27.6                | 28.9             | 31.9                |
| Skewness                                              | 1.4               | -0.14               | 0.29             | 1.4                 |
| Kurtosis                                              | 1.6               | -1.1                | -1.2             | 2.4                 |
| P-value <sub>split</sub>                              | 0.7               | 0.5                 | 0.6              | 0.5                 |
| <b>Cluster radius (nm)</b>                            |                   |                     |                  |                     |
| Mean $\pm$ SEM                                        | 17.1 $\pm$ 0.5    | 16.3 $\pm$ 0.5      | 13.6 $\pm$ 0.4   | 13.3 $\pm$ 0.2      |
| Median                                                | 16.2              | 15.3                | 12.8             | 13.1                |
| CV (%)                                                | 20.1              | 20.4                | 20.2             | 11.0                |
| Skewness                                              | 1.7               | 1.5                 | 2.0              | 0.5                 |
| Kurtosis                                              | 3.6               | 1.5                 | 5.4              | 0.41                |
| P-value <sub>split</sub>                              | 0.4               | 0.3                 | 0.4              | 0.5                 |
| <b>HER2 / cluster</b>                                 |                   |                     |                  |                     |
| Mean $\pm$ SEM                                        | 2.7 $\pm$ 0.1     | 2.8 $\pm$ 0.1       | 2.6 $\pm$ 0.1    | 2.9 $\pm$ 0.1       |
| Median                                                | 2.6               | 2.7                 | 2.6              | 2.6                 |
| CV (%)                                                | 32.5              | 23.8                | 26.9             | 33.8                |
| Skewness                                              | 1.3               | 0.51                | 1.9              | 0.88                |
| Kurtosis                                              | 1.8               | -0.27               | 6.6              | 0.37                |
| P-value <sub>split</sub>                              | 0.4               | 0.5                 | 0.6              | 0.5                 |
| <b>Clustered HER2 (%)</b>                             |                   |                     |                  |                     |
| Mean $\pm$ SEM                                        | 48 $\pm$ 2        | 44 $\pm$ 2          | 34 $\pm$ 2       | 33 $\pm$ 1          |
| Median                                                | 48.2              | 41.6                | 30.9             | 34.1                |
| CV (%)                                                | 25.6              | 26.9                | 29.2             | 19.5                |
| Skewness                                              | 0.85              | 0.76                | 0.91             | -0.94               |
| Kurtosis                                              | 0.49              | 0.40                | 0.63             | 1.9                 |
| P-value <sub>split</sub>                              | 0.6               | 0.7                 | 0.5              | 0.3                 |
| <b># of HER2 clusters / ROI</b>                       |                   |                     |                  |                     |
| Mean $\pm$ SEM                                        | 1264 $\pm$ 98     | 928 $\pm$ 48        | 365 $\pm$ 22     | 347 $\pm$ 15        |
| Median                                                | 967               | 975                 | 315              | 350                 |
| CV (%)                                                | 53.3              | 36.6                | 37.6             | 29.9                |
| Skewness                                              | 0.94              | 0.49                | 0.58             | 0.45                |
| Kurtosis                                              | -0.19             | 0.66                | -0.78            | -0.18               |
| P-value <sub>split</sub>                              | 0.4               | 0.7                 | 0.5              | 0.3                 |
| Coverslips imaged                                     | 3                 | 3                   | 3                | 3                   |
| Total cells                                           | 15                | 15                  | 15               | 15                  |
| Total random ROIs                                     | 58                | 60                  | 60               | 60                  |
| Total clustered ROIs                                  | 47                | 51                  | 40               | 47                  |

| <b>b</b>                                              | Trastuzumab-AF647 |                | Pertuzumab-AF647 |                |
|-------------------------------------------------------|-------------------|----------------|------------------|----------------|
|                                                       | SK-BR-3           | JIMT-1         | SK-BR-3          | JIMT-1         |
| <b>Density (molecules/<math>\mu\text{m}^2</math>)</b> |                   |                |                  |                |
| Mean $\pm$ SEM                                        | 181 $\pm$ 9       | 22 $\pm$ 1     | 57 $\pm$ 3       | 10 $\pm$ 0.4   |
| Median                                                | 169               | 22.3           | 50.5             | 9.6            |
| CV (%)                                                | 37.3              | 22.9           | 37.3             | 29.0           |
| Skewness                                              | 0.87              | 0.098          | 1.0              | 0.61           |
| Kurtosis                                              | 0.021             | -0.73          | 0.27             | -0.70          |
| P-value <sub>split</sub>                              | 0.5               | 0.5            | 0.2              | 0.6            |
| <b>Cluster radius (nm)</b>                            |                   |                |                  |                |
| Mean $\pm$ SEM                                        | 17.4 $\pm$ 0.4    | 14.9 $\pm$ 0.5 | 14.5 $\pm$ 0.4   | 15.8 $\pm$ 0.8 |
| Median                                                | 16.6              | 14.3           | 13.8             | 14.8           |
| CV (%)                                                | 15.3              | 15.3           | 13.7             | 20.6           |
| Skewness                                              | 0.53              | 1.9            | 0.87             | 1.5            |
| Kurtosis                                              | -0.94             | 4.5            | 0.038            | 3.2            |
| P-value <sub>split</sub>                              | 0.6               | 0.6            | 0.6              | 0.5            |
| <b>HER2 / cluster</b>                                 |                   |                |                  |                |
| Mean $\pm$ SEM                                        | 2.9 $\pm$ 0.2     | 2.0 $\pm$ 0.1  | 2.8 $\pm$ 0.2    | 2.5 $\pm$ 0.2  |
| Median                                                | 2.4               | 1.9            | 2.6              | 2.0            |
| CV (%)                                                | 53.6              | 20.0           | 34.7             | 38.1           |
| Skewness                                              | 2.6               | 0.91           | 1.2              | 0.70           |
| Kurtosis                                              | 8.3               | -0.30          | 1.3              | -1.1           |
| P-value <sub>split</sub>                              | 0.6               | 0.4            | 0.3              | 0.5            |
| <b>Clustered HER2 (%)</b>                             |                   |                |                  |                |
| Mean $\pm$ SEM                                        | 52 $\pm$ 2        | 36 $\pm$ 2     | 39 $\pm$ 2       | 39 $\pm$ 3     |
| Median                                                | 49.3              | 33.4           | 36.9             | 38.6           |
| CV (%)                                                | 19.3              | 23.2           | 23.2             | 32.2           |
| Skewness                                              | 0.26              | 1.6            | 0.72             | 0.47           |
| Kurtosis                                              | -0.89             | 3.3            | 0.058            | -1.0           |
| P-value <sub>split</sub>                              | 0.5               | 0.2            | 0.6              | 0.7            |
| <b># of HER2 clusters / ROI</b>                       |                   |                |                  |                |
| Mean $\pm$ SEM                                        | 1222 $\pm$ 84     | 117 $\pm$ 9    | 333 $\pm$ 25     | 62 $\pm$ 5     |
| Median                                                | 1072              | 103            | 303              | 54             |
| CV (%)                                                | 43.7              | 32.6           | 37.6             | 33.3           |
| Skewness                                              | 0.80              | 0.88           | 1.4              | 0.64           |
| Kurtosis                                              | -0.38             | -0.037         | 1.8              | -0.77          |
| P-value <sub>split</sub>                              | 0.4               | 0.8            | 0.6              | 0.5            |
| Coverslips imaged                                     | 3                 | 3              | 3                | 3              |
| Total cells                                           | 15                | 15             | 14               | 15             |
| Total random ROIs                                     | 60                | 59             | 55               | 60             |
| Total clustered ROIs                                  | 40                | 20             | 26               | 17             |

**Table S2 Summary of *p* values for qSMLM data for cultured cell lines.**

|                                                 | Trastuzumab-AF647                    |                          | Pertuzumab-AF647                     |                          | BT-474                              | BT-474 <sup>R</sup>                 | SK-BR-3                             | JIMT-1                              |
|-------------------------------------------------|--------------------------------------|--------------------------|--------------------------------------|--------------------------|-------------------------------------|-------------------------------------|-------------------------------------|-------------------------------------|
|                                                 | BT-474<br>vs.<br>BT-474 <sup>R</sup> | SK-BR-3<br>vs.<br>JIMT-1 | BT-474<br>vs.<br>BT-474 <sup>R</sup> | SK-BR-3<br>vs.<br>JIMT-1 | Trastuzuma<br>b vs. Per-<br>tuzumab | Trastuzuma<br>b vs. Per-<br>tuzumab | Trastuzuma<br>b vs. Per-<br>tuzumab | Trastuzuma<br>b vs. Per-<br>tuzumab |
| Mean density (mole-<br>cules/ $\mu\text{m}^2$ ) | 0.003                                | 2.4E-26                  | 0.083                                | 2.3E-23                  | 4.6E-16                             | 5.1E-21                             | 1.1E-21                             | 1.1E-27                             |
| Cluster radius (nm)                             | 0.12                                 | 2.2E-04                  | 0.30                                 | 0.071                    | 4.1E-07                             | 8.6E-08                             | 1.7E-06                             | 1.6E-01                             |
| HER2 / cluster                                  | 0.47                                 | 7.4E-04                  | 0.097                                | 0.25                     | 0.26                                | 0.25                                | 0.31                                | 0.026                               |
| Clustered HER2 (%)                              | 0.039                                | 1.7E-08                  | 0.32                                 | 0.50                     | 2.3E-08                             | 1.1E-07                             | 7.2E-07                             | 0.18                                |
| # of HER2 clusters / ROI                        | 0.002                                | 3.2E-16                  | 0.24                                 | 1.3E-11                  | 2.8E-12                             | 2.4E-17                             | 1.7E-13                             | 2.6E-06                             |

**Table S3. Patient characteristics.**

|                                | P18      | P20      | P21      | P23      | P25      | P26      |
|--------------------------------|----------|----------|----------|----------|----------|----------|
| Age                            | 50       | 59       | 31       | 63       | 61       | 56       |
| Pre-op clinical stage          | T1 N1    | T2 N0    | T4 N1    | T2 N0    | T2 N1    | T2 N1    |
| ER (biopsy)                    | negative | positive | positive | positive | positive | positive |
| PR (biopsy)                    | negative | negative | negative | positive | positive | negative |
| HER2 IHC (biopsy)              | 3+       | 2+       | 3+       | 3+       | 3+       | 3+       |
| HER2 FISH copy number (biopsy) | N/A      | 2        | 18.8     | 32.7     | N/A      | 15.5     |
| HER2 FISH ratio (biopsy)       | N/A      | 1        | 9.2      | 10.1     | N/A      | 11.1     |
| Ki-67 (biopsy)                 | N/A      | 75%      | N/A      | 20%      | 50%      | 70%      |
| Post-op pathologic stage       | T1a N0   | T1b N1a  | T0 N0    | T0 N0    | T0 N0    | Tis N0   |
| RCB                            | RCB-I    | RCB-II   | pCR      | pCR      | pCR      | pCR      |

**Table S4 Summary of qSMLM data for patient samples.**

|                                                              | P18           | P20           | P21           | P23           | P25 S1        | P25 S2        | P26           |
|--------------------------------------------------------------|---------------|---------------|---------------|---------------|---------------|---------------|---------------|
| <b><u>Density (molecules/<math>\mu\text{m}^2</math>)</u></b> |               |               |               |               |               |               |               |
| Mean $\pm$ SEM                                               | 49 $\pm$ 7    | 58 $\pm$ 4    | 123 $\pm$ 7   | 157 $\pm$ 7   | 99 $\pm$ 7    | 137 $\pm$ 9   | 59 $\pm$ 6    |
| Median                                                       | 34.5          | 47.5          | 101           | 136           | 104           | 120           | 47.2          |
| CV (%)                                                       | 95.5          | 53.9          | 44.3          | 46.6          | 46.8          | 50.2          | 79.1          |
| Skewness                                                     | 2.2           | 0.55          | 0.6           | 0.57          | -0.074        | 0.43          | 1.4           |
| Kurtosis                                                     | 4.3           | -0.91         | -0.064        | -0.84         | -1.1          | -0.75         | 1.5           |
| P-valuesplit                                                 | 0.5           | 0.5           | 0.5           | 0.6           | 0.5           | 0.5           | 0.3           |
| <b><u>Cluster radius (nm)</u></b>                            |               |               |               |               |               |               |               |
| Mean $\pm$ SEM                                               | 18 $\pm$ 1.8  | 26 $\pm$ 1.5  | 34 $\pm$ 2.2  | 25 $\pm$ 1.1  | 34 $\pm$ 5.1  | 31 $\pm$ 1.3  | 38 $\pm$ 6.3  |
| Median                                                       | 15            | 25.8          | 29.9          | 22.1          | 28.3          | 30            | 30.1          |
| CV (%)                                                       | 40.3          | 11.2          | 49.9          | 38.3          | 45.1          | 18.9          | 49.7          |
| Skewness                                                     | 2.5           | 0.3           | 2.5           | 1.4           | 1.4           | 0.78          | 1.7           |
| Kurtosis                                                     | 6.5           | -0.35         | 8             | 1.4           | 2.5           | 0.097         | 2.8           |
| P-valuesplit                                                 | 0.3           | 0.4           | 0.6           | 0.8           | 0.5           | 0.4           | 0.6           |
| <b><u>HER2 / cluster</u></b>                                 |               |               |               |               |               |               |               |
| Mean $\pm$ SEM                                               | 2.3 $\pm$ 0.2 | 1.8 $\pm$ 0.1 | 3.8 $\pm$ 0.3 | 2.7 $\pm$ 0.1 | 3.0 $\pm$ 0.7 | 2.6 $\pm$ 0.1 | 2.9 $\pm$ 0.5 |
| Median                                                       | 2             | 1.78          | 3.18          | 2.37          | 2.06          | 2.43          | 2.31          |
| CV (%)                                                       | 38.6          | 6.03          | 69.9          | 38.4          | 73.8          | 22.7          | 54.2          |
| Skewness                                                     | 3.1           | -0.34         | 3.7           | 1.3           | 2.5           | 0.39          | 1.5           |
| Kurtosis                                                     | 11.2          | -4            | 16            | 1.3           | 6.5           | -1.1          | 1.5           |
| P-valuesplit                                                 | 0.3           | 0.4           | 0.7           | 0.7           | 0.5           | 0.6           | 0.4           |
| <b><u>Clustered HER2 (%)</u></b>                             |               |               |               |               |               |               |               |
| Mean $\pm$ SEM                                               | 33 $\pm$ 4    | 31 $\pm$ 2    | 64 $\pm$ 2    | 54 $\pm$ 2    | 66 $\pm$ 7    | 59 $\pm$ 2    | 73 $\pm$ 5    |
| Median                                                       | 32.2          | 29.8          | 63.8          | 51.2          | 62            | 58.2          | 73.3          |
| CV (%)                                                       | 48            | 11.3          | 28.9          | 34.4          | 31.3          | 18.2          | 21.6          |
| Skewness                                                     | 1.8           | 1.2           | -0.016        | 0.73          | -0.052        | 0.042         | -0.0057       |
| Kurtosis                                                     | 4             | 0.74          | -0.91         | -0.29         | -1.6          | -0.33         | -1.7          |
| P-valuesplit                                                 | 0.6           | 0.6           | 0.4           | 0.4           | 0.2           | 0.6           | 0.5           |
| <b><u># of HER2 clusters / ROI</u></b>                       |               |               |               |               |               |               |               |
| Mean $\pm$ SEM                                               | 199 $\pm$ 51  | 118 $\pm$ 33  | 732 $\pm$ 49  | 878 $\pm$ 60  | 909 $\pm$ 82  | 778 $\pm$ 71  | 638 $\pm$ 89  |
| Median                                                       | 145           | 99            | 604           | 690           | 910           | 651           | 625           |
| CV (%)                                                       | 105           | 55.8          | 51.9          | 57.5          | 27.2          | 41.7          | 41.8          |
| Skewness                                                     | 2             | 1.3           | 0.7           | 0.87          | 0.65          | 1.1           | 0.92          |
| Kurtosis                                                     | 3.2           | 1.2           | -0.4          | 0.17          | -0.69         | 0.72          | 2.2           |
| P-valuesplit                                                 | 0.7           | 0.5           | 0.6           | 0.5           | 0.5           | 0.7           | 0.5           |
| Coverslips Imaged                                            | 2             | 2             | 2             | 2             | 2             | 2             | 2             |
| Total cells                                                  | 12            | 14            | 20            | 21            | 14            | 15            | 14            |
| Total random ROIs                                            | 47            | 58            | 69            | 102           | 45            | 60            | 56            |
| Total clustered ROIs                                         | 17            | 4             | 61            | 70            | 9             | 21            | 9             |



**Table S5 Summary of *p* values for qSMLM data for patient samples.**

|               |        | Mean density<br>(molecules/ $\mu\text{m}^2$ ) | Cluster radius<br>(nm) | HER2 / cluster | Clustered<br>HER2 (%) | # of HER2<br>clusters / ROI |
|---------------|--------|-----------------------------------------------|------------------------|----------------|-----------------------|-----------------------------|
| P18<br>vs.    | P20    | 0.15                                          | 0.002                  | 0.017          | 0.31                  | 0.099                       |
|               | P21    | 7.8E-12                                       | 1.8E-07                | 1.6E-04        | 5.5E-08               | 4.8E-10                     |
|               | P23    | 2.5E-19                                       | 0.006                  | 0.037          | 3.4E-05               | 1.4E-12                     |
|               | P25 S1 | 1.3E-06                                       | 0.007                  | 0.19           | 5.0E-04               | 1.7E-06                     |
|               | P25 S2 | 4.5E-12                                       | 1.1E-06                | 0.13           | 2.1E-06               | 5.9E-08                     |
|               | P26    | 0.14                                          | 0.006                  | 0.13           | 6.3E-06               | 4.1E-04                     |
| P20<br>vs.    | P21    | 6.5E-14                                       | 0.003                  | 8.8E-08        | 9.2E-11               | 7.9E-11                     |
|               | P23    | 9.2E-24                                       | 0.047                  | 1.3E-09        | 8.3E-08               | 8.9E-14                     |
|               | P25 S1 | 9.5E-07                                       | 0.084                  | 0.068          | 3.9E-04               | 2.1E-06                     |
|               | P25 S2 | 2.0E-12                                       | 0.021                  | 3.8E-06        | 2.7E-08               | 9.5E-09                     |
|               | P26    | 0.41                                          | 0.047                  | 0.029          | 1.2E-05               | 1.4E-04                     |
| P21<br>vs.    | P23    | 3.1E-04                                       | 0.27                   | 0.002          | 6.5E-04               | 0.031                       |
|               | P25 S1 | 0.007                                         | 0.50                   | 0.17           | 0.40                  | 0.042                       |
|               | P25 S2 | 0.10                                          | 0.099                  | 5.7E-04        | 0.048                 | 0.30                        |
|               | P26    | 7.0E-11                                       | 0.27                   | 0.10           | 0.088                 | 0.19                        |
| P23<br>vs.    | P25 S1 | 3.0E-08                                       | 0.30                   | 0.37           | 0.057                 | 0.38                        |
|               | P25 S2 | 0.042                                         | 0.14                   | 0.16           | 0.061                 | 0.14                        |
|               | P26    | 3.2E-19                                       | 0.50                   | 0.35           | 0.003                 | 0.020                       |
| P25 S1<br>vs. | P25 S2 | 5.6E-04                                       | 0.27                   | 0.29           | 0.16                  | 0.12                        |
|               | P26    | 2.2E-05                                       | 0.30                   | 0.49           | 0.24                  | 0.020                       |
| P25 S2 vs.    | P26    | 6.2E-11                                       | 0.14                   | 0.24           | 0.016                 | 0.12                        |
